# Supplementary material for: A Multilayered Imaging and Microfluidics Approach for Evaluating the Effect of Fibrinolysis in Staphylococcus aureus Biofilm Formation
Source: MDPI journal article supplement (doi:10.3390/pathogens12091141), 2023-09-06
Supplement: s1 [file s1]

| <b>pList of abbreviations</b> |                                   |
|-------------------------------|-----------------------------------|
| ACD                           | acid-citrate-dextrose             |
| ECM                           | extracellular matrix              |
| eDNA                          | extracellular DNA                 |
| HRP                           | horseradish peroxidase            |
| PDMS                          | polydimethylsiloxane              |
| TSB                           | tryptic soy broth                 |
| NP                            | normal plasma                     |
| HS                            | human serum                       |
| FG                            | fibrinogen                        |
| FG <sup>-</sup>               | fibrinogen-depleted plasma        |
| FN                            | fibronectin                       |
| FVII                          | factor VII                        |
| FVII <sup>-</sup>             | factor VII-depleted plasma        |
| FX                            | factor X                          |
| FX <sup>-</sup>               | factor X-depleted plasma          |
| HA                            | hyaluronic acid                   |
| IgG                           | immunoglobulin                    |
| IgG <sup>-</sup>              | IgG-depleted plasma               |
| PLG                           | plasminogen                       |
| PLG <sup>-</sup>              | plasminogen-depleted plasma       |
| PzP                           | plasma from patient               |
| uPA                           | urokinase plasminogen activator   |
| tPA                           | tissue-type plasminogen activator |
| BF                            | bright field                      |
| GFP                           | green fluorescent protein         |
| PI                            | propidium iodide                  |
| ROI                           | region of interest                |
| MFI                           | median fluorescence intensity     |
| rMFI                          | relative MFI                      |
| CI                            | circularity index                 |
